# Supplementary material
Source: PubMed Central journal article supplement (PMC2704254)
Supplement: NIHMS106821-supplement-Sun_SC_supple.pdf [file NIHMS106821-supplement-Sun_SC_supple.pdf]

## Supplementary Information

### Mesenchymal Stem Cell Transplantation Reverses Multi-Organ Dysfunction in Systemic Lupus Erythematosus Mice and Humans

LINGYUN SUN\*, KENTARO AKIYAMA\*, HUAYONG ZHANG, TAKAYOSHI YAMAZA, YAYI HOU, SHENGNAN ZHAO, TING XU, ANH LE, SONGTAO SHI

\*equal contribution

#### MATERIALS AND METHODS

**Antibodies.** Purified anti-mouse IgG and anti-CD138 antibodies were purchased from R&D Systems. Purified anti-IL17 and anti-Runx2 antibodies were obtained from Santa Cruz and Oncogene, respectively. Purified C3 antibody was from GeneTex. Anti-CD3 antibody was purchased from abcam. Anti-ALP (LF47) and anti-OCN (LF32) were kindly provided by Dr. Larry Fisher (National Institute of Dental and Craniofacial Research, National Institutes of Health). Anti- $\beta$ -actin antibody was purchased from Sigma. APC-conjugated and PerCP-conjugated anti-CD4, APC-conjugated anti-CD25, PE-conjugated anti-CD138 and PE-conjugated anti-IL17, were from BD Bioscience. PE-conjugated anti-Foxp3 antibody was obtained from Miltenyi Biotech. Antibodies for mouse immunoglobulins IgG, IgA and IgM were purchased from Invitrogen.

**MicroCT and pQCT analysis.** Distal femoral metaphyses were harvested from 20-week-old mice. Distal femoral metaphyses were analyzed by  $\mu$ CT (ScanXmate-A100S; Comscantecno Co. Ltd., Kanagawa, Japan). Scanning regions were confined to secondary spongiosa and the thickness was approximately 1.0 mm. Using 2-dimensional images, a region of interest was manually drawn near the endocortical surface. Structural indices and bone mineral density (BMD) were calculated using 3-dimensional image analysis system (TRI/3D-Bon software; Ratoc System Engineering Co. Ltd.). Structural indices are including bone volume/trabecular volume (BV/TV), bone surface area (BS, mm<sup>2</sup>), trabecular number (Tb.N, 1/mm), and trabecular separation (Tb.Sp, mm).

1  
2  
3  
4  
5  
6  
7  
8  
9  
10  
11  
12  
13  
**Mineralized tissue analysis.** Femurs and transplant tissue were fixed with 4% paraformaldehyde (PFA) in phosphate buffered saline (PBS), pH 7.2, overnight at 4°C, and decalcified with 5% EDTA (pH 7.4) in PBS, pH 7.2, for 10 days at 4°C. Bone samples were dehydrated with a graduate series of ethanol, cleaned with xylene, and immersed in paraffin. The samples were embedded in paraffin and cut into 8- $\mu$ m-thick sections. The sections were deparaffinized, rehydrated and used for H&E staining and further histochemical staining.

14  
15  
16  
17  
18  
19  
20  
21  
22  
23  
24  
**TRAP staining.** Deparaffinized sections were re-fixed with a mixture of 50% ethanol and 50% acetone for 10 min. TRAP-staining solutions were freshly made (1.6% naphthol AS-BI phosphate in N, N-dimethylformamide and 0.14% fast red-violet LB diazonium salt, 0.097% tartaric acid and 0.04% MgCl<sub>2</sub> in 0.2 M sodium acetate buffer, pH 5.0) and mixed in 1:10. The sections were incubated in the solution for 10 min at 37°C under shield and counterstained with toluidine blue. All reagents for TRAP staining were purchased from Sigma.

25  
26  
27  
28  
29  
30  
31  
32  
33  
**Immunohistochemistry.** Sections were treated with 0.3% hydrogen peroxide and 0.1% sodium azide in PBS, pH 7.2, for 30 min, and incubated with indicated primary antibodies, overnight, at 4°C. After washing with PBS, the sections were immunostained using SuperPicTure™ Polymer Detection kit (Invitrogen) according to the manufacturer's instructions. Finally, samples were counterstained with hematoxylin.

34  
35  
36  
37  
38  
39  
40  
41  
42  
43  
44  
45  
46  
47  
48  
49  
**Mouse BMMSC isolation and culture.** Bone marrow cells were flushed out from bone cavity of femurs and tibias with heat-inactivated 3% fetal bovine serum (FBS; Equitech-Bio) in PBS. All nuclear cells (ANCs) were seeded at 10-20 x 10<sup>6</sup> into 100 mm culture dishes (Corning) and initially incubated for 3 hours under 37°C at 5% CO<sub>2</sub> condition. To eliminate the non-adherent cells, the cultures were washed with PBS twice. The attached cells were cultured for 14-16 days. Colonies-forming attached cells were passed once to use for further experiments. The BMMSCs were cultured with  $\alpha$ -MEM (Invitrogen) supplemented with 20% FBS, 2 mM L-glutamine (Invitrogen), 55  $\mu$ M 2-mercaptoethanol (Invitrogen) and antibiotics (100 U/ml penicillin and 100  $\mu$ g/ml streptomycin; Biofluids).

50  
51  
52  
53  
54  
55  
56  
57  
58  
59  
60  
**Human BMMSC culture.** Human bone marrow aspirated from iliac of eight donors selected from relatives of the patients and two SLE patients (case 5 and 7 in Table 1) were diluted with PBS containing heparin (1,250 U/ml) and separated using Ficoll-Hypaque (density 1.077 g/ml, TBD) by centrifuge at 2000 rpm for 30 minutes to obtain mononuclear cells. The single cell suspensions (5 x 10<sup>6</sup>/ml) were cultured in 25 cm<sup>2</sup> flasks (Corning) with DMEM supplemented

1  
2  
3 with 10% FBS and antibiotics at 37°C with medium change every 24-48 hours until the  
4 BMMSCs achieved required numbers at 3-4 passages. The BMMSCs were used for *in vivo*  
5 transplantation and *in vitro* osteogenic differentiation. For the allogenic MSCT, human SLE  
6 BMMSCs were cultured under non-serum-depleted condition for 12 hours prior to MSCT, and  
7 repeatedly washed with 0.25% trypsin and then mixed with 5% human albumin in physiological  
8 saline.  
9

10  
11  
12  
13  
14 **CFU-F assay.** ANCs ( $1.5 \times 10^6$ /flask) were seeded on T-25 flasks (Nunc) and incubated at 37°C.  
15 After 3 hours, the flasks were washed with PBS and cultured for 16 days. After washing with  
16 PBS two times, the flasks were treated with 2% PFA and 1% toluidine blue solution in PBS. Cell  
17 clusters containing  $\geq 50$  cells were recognized as a colony under light microscopy. Total colony  
18 numbers were counted per flask. The CFU-F number was repeated in five or six independent  
19 samples per each experimental group.  
20  
21  
22  
23

24  
25 **Cell proliferation assay.** Mouse BMMSCs ( $10 \times 10^3$ /well) were seeded on 2-well chamber  
26 slides (Nunc) and cultured for 2-3 days. The cultures were incubated with BrdU solution (1:100)  
27 (Invitrogen) for 20 hours, and stained with a BrdU staining kit (Invitrogen) according to the  
28 manufacturer's instructions. The samples were stained with hematoxylin. BrdU-positive and total  
29 cell numbers were counted in ten images per subject. The number of BrdU-positive cells was  
30 indicated as a percentage to the total cell number. The BrdU assay was repeated in five or six  
31 independent samples for each experimental group.  
32  
33  
34  
35  
36

37  
38 ***In vitro* differentiation assay.** BMMSCs were cultured under osteogenic culture condition  
39 containing 2 mM  $\beta$ -glycerophosphate (Sigma), 100  $\mu$ M L-ascorbic acid 2-phosphate (Wako Pure  
40 Chemicals) and 10 nM dexamethasone (Sigma). After the osteo-induction, the cultures were  
41 stained with alizarin red. For the adipo-induction *in vitro*, 500 nM isobutylmethylxanthin  
42 (Sigma), 60  $\mu$ M indomethacin (Sigma), 500 nM hydrocortisone (Sigma), 10  $\mu$ g/ml insulin  
43 (Sigma), 100 nM L-ascorbic acid phosphate were added into the medium. Two weeks after the  
44 adipo-induction, the cultures were stained with Oil Red-O. The mineralized area and Oil Red-O  
45 positive cells were quantified by using an NIH Image-J. Total RNA and total protein were  
46 isolated from the mouse BMMSC cultures after two weeks inductions. All experiments were  
47 repeated in five or six independent samples for each group.  
48  
49  
50  
51  
52  
53  
54

55 ***In vivo* bone formation assay.** Approximately  $4.0 \times 10^6$  of BMMSCs were mixed with 40 mg of  
56 HA/TCP ceramic powder (Zimmer) as a carrier and subcutaneously transplanted into the dorsal  
57  
58  
59  
60

1  
2  
3 surface of 8-10 weeks old immunocompromised mice. Eight weeks post-transplantation, the  
4 transplants were harvested, fixed in 4% PFA and then decalcified with 10% EDTA (pH 8.0),  
5 followed by paraffin embedding. Paraffin sections were deparaffinized and stained with H&E.  
6  
7

8  
9 **Semi quantitative RT-PCR.** Total RNA was isolated from the cultures using SV total RNA  
10 isolation kit (Promega) and digested with DNase I following the manufacture's protocols. The  
11 cDNA was synthesized from 100 ng of total RNA using Superscript III (Invitrogen). And then,  
12 PCR was performed using gene specific primers and Platinum PCR supermix (Invitrogen). [The](#)  
13 [amplified PCR products were subjected to 2% agarose gels which contain ethidium bromide and](#)  
14 [visualized by UV fluorescent. The intensity of bands was measured by using NIH image-J soft](#)  
15 [ware and normalized to GAPDH.](#) RT-PCR was repeated in five or six independent samples.  
16  
17

18  
19 **Western blot analysis.** Samples were lysed in M-PER extraction reagent (Pierce). The protein  
20 was quantified using Bio-Rad Protein Assay (Bio-Rad) and V max micro plate reader (Molecular  
21 Devices). Ten  $\mu$ g of protein were applied to each lane and separated on Tris-Glycine SDS-PAGE  
22 gel (Invitrogen). Proteins were transferred onto Immobilon-P (Millipore). Membranes were  
23 incubated with primary antibodies (1: 100-1000 dilution), over night at 4°C, and then incubated  
24 with HRP-conjugated secondary antibodies (Santa Cruz) at 1:5000 dilutions for 1 hour at room  
25 temperature. The membranes were washed and reacted with Super Signal chemiluminescence  
26 HRP substrate (Pierce) and visualized on BIOMAX MR films (Kodak). [The intensity of bands](#)  
27 [was measured using same methods as semi quantitative PCR and normalized to  \$\beta\$  actin.](#) Western  
28 blotting was repeated in five or six times.  
29  
30

31  
32 **ELISA.** Peripheral blood were collected from the retro-orbital plexus, and centrifuged to obtain  
33 the blood serum. Urine was also collected. Tissue lysates were extracted from mouse spleen. The  
34 samples were centrifuged and used for ELISA. Anti-dsDNA IgG and IgM antibodies, ANA,  
35 albumin, C3, IL17, IL6, RANKL and C-terminal telopeptides of type I collagen were measured  
36 using commercial available kits (anti-dsDNA antibodies, ANA, albumin, C3, alpha diagnostic;  
37 IL17, IL6 and RANKL, R&D Systems; C-terminal telopeptides of type I collagen, Nordic  
38 Bioscience Diagnostics A/S) according to the manufactures' instructions. To measure total TGF $\beta$ ,  
39 acid-treated samples were analyzed using a kit (Promega) according to the manufacture's  
40 instruction. For the analysis of immunoglobulins, the samples were incubated on wells coated  
41 with anti-mouse immunoglobulins antibody (10  $\mu$ g/ml, Invitrogen), followed by the treatment  
42 using Mouse Mono-AB ID/SP kit (Invitrogen) according to the manufacture's protocols.  
43  
44  
45  
46  
47  
48  
49  
50  
51  
52  
53  
54  
55  
56  
57  
58  
59  
60

1  
2  
3 Creatinine levels in serum and urine were assayed using a commercial kit (R&D Systems). The  
4 results were averaged in each group. The intra-group differences were calculated between the  
5 mean values.  
6  
7

8  
9 **Clinical tests for serum C3 and urine protein.** Peripheral blood serum and urine samples were  
10 collected from SLE patients and measured C3 levels in the serum and protein level in the urine in  
11 the Clinical Laboratory at the Drum Tower Hospital of Nanjing University Medical School.  
12

13  
14 **Histological analysis of kidney, liver and spleen.** Samples were fixed with 4% PFA for 24  
15 hours at 4°C, and embedded with paraffin or Tissue-Tek O.C.T. compound (Sakura). Paraffin  
16 Sections were used for H&E staining, trichrome staining, Periodic Acid Schiff (PAS) staining  
17 and immunohistochemistry. Frozen sections were used for immunohistochemistry and Oil Red-O  
18 staining.  
19  
20  
21

22  
23 **Histomorphometry.** Area of trabecular bone and bone marrow was measured on H&E stained  
24 slides. To quantify osteoclast activity in the bones, number of mature osteoclasts was determined  
25 by TRAP positive cells that attached on the bone surface. Osteoblastic niche was quantified by  
26 the number of osteoblasts lining on the bone surface per bone marrow area with H&E staining.  
27 Quantification of newly-formed bone and marrow area was measured on transplant sections with  
28 H&E staining. The number of cells and the area were measured from five to seven representative  
29 images each sample using an NIH Image-J. The data were average the means in each  
30 experimental group. The results were shown as each indicated percentage.  
31  
32  
33  
34  
35  
36

37  
38 **Flow cytometric analysis.** Mouse spleen cells and spleen-derived CD4<sup>+</sup> T lymphocytes were  
39 used for cytometric analysis. For analysis in SLE patients (n=4), peripheral blood mononuclear  
40 cells were separated using 2 m peripheral blood samples by Ficoll-Hypaque density  
41 centrifugation. For Treg staining, cells (1 x 10<sup>6</sup>/sample or subject) were stained with APC-  
42 conjugated anti-CD25 antibody in mouse samples and APC-conjugated anti-CD4 antibody in  
43 human samples for 30 minutes under the shield at 4°C, followed by staining with PE-conjugated  
44 anti-Foxp3 antibody using Foxp3 Staining Buffer Set (eBioscience) according to the  
45 manufacture's protocol for cell fixation and permeabilization. Cells isolated from spleen and  
46 bone marrow were stained with PE-conjugated anti-CD138 antibody. The samples were analyzed  
47 in a flow cytometer. For Th17 cell staining, cells (1 x 10<sup>6</sup>/sample) were incubated with PerCP-  
48 conjugated anti-CD4 antibody. After cell fixation and permeabilization, cells were stained with  
49 PE-conjugated anti-IL17 antibody.  
50  
51  
52  
53  
54  
55  
56  
57  
58  
59  
60

1  
2  
3  
4  
5  
6  
7  
8  
9  
10  
11  
12  
13  
14  
15  
16  
17  
18  
19  
20  
21  
22  
23  
24  
25  
26  
27  
28  
29  
30  
31  
32  
33  
34  
35  
36  
37  
38  
39  
40  
41  
42  
43  
44  
45  
46  
47  
48  
49

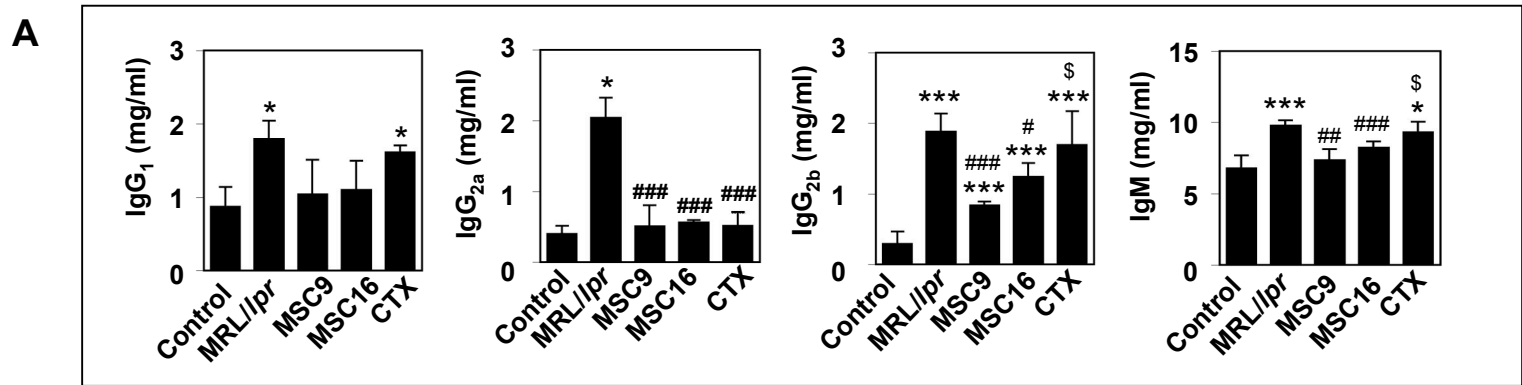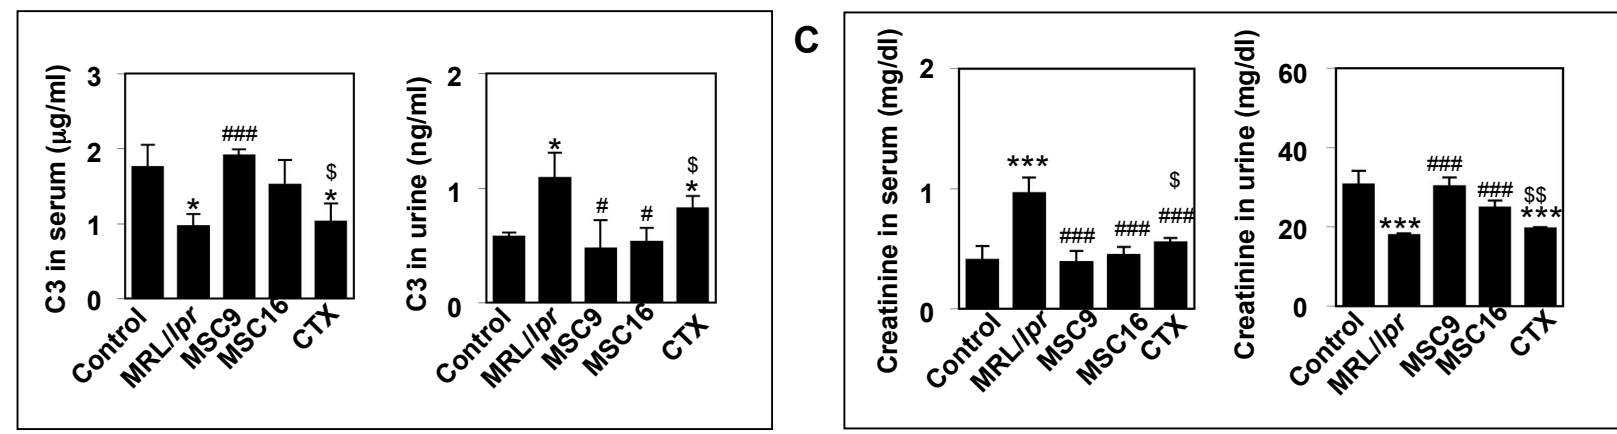

**Supplementary Figure 1. Allogenic MSCT recovered the levels of immunoglobulins, C3 and creatinine in peripheral blood serum and urine** (A) ELISA indicated that allogenic MSCT (MSC9, n=6; MSC16, n=6) reduced serum levels of IgG<sub>1</sub>, IgG<sub>2a</sub>, IgG<sub>2b</sub> and IgM (mean±SD) when compared to *lupus*-like MRL/*lpr* mice (MRL/*lpr*, n=6). CTX treatment (n=6) only significantly reduced IgG<sub>2a</sub> level. [\*\*\**P*<0.005 vs. Control (n=6); \**P*<0.05 vs. Control; ###*P*<0.05 vs. MRL/*lpr*; ##*P*<0.01 vs. MRL/*lpr*; #*P*<0.05 vs. MRL/*lpr*; §*P*<0.05 vs. MSC9]. (B) ELISA revealed that MRL/*lpr* mice (MRL/*lpr*, n=6) showed significantly reduced C3 level (mean±SD) in serum and elevated C3 level in urine compared to control group (n=6). MSCT at 9 weeks of age (MSC9, n=6) significantly recovered C3 levels in serum. MSCT at 16 weeks of age (MSC16, n=6) elevated C3 level in serum was no statistic significance from MRL/*lpr* mice. Both MSC9 and MSC16 were able to significantly reduce urine C3 levels. However, CTX treatment (n=6) failed to recover the C3 level in serum and urine. [\**P*<0.05 vs. Control; ###*P*<0.05 vs. MRL/*lpr*; #*P*<0.05 vs. MRL/*lpr*; §*P*<0.05 vs. MSC9 (in serum) and MSC16 (in urine)]. (C) ELISA revealed that creatinine level (mean±SD) in MRL/*lpr* mice (MRL/*lpr*, n=6) showed a significant increase in serum and decrease in urine when compared to control mice (n=6). Allogenic MSCT (MSC9, MSC16) significantly recovered both serum and urine creatinine levels. CTX treatment (n=6) failed to recover the urine creatinine level. [\*\*\**P*<0.005 vs. Control; ###*P*<0.005 vs. MRL/*lpr*; §*P*<0.01, vs. MSCT (MSC9 and MSCT16); §*P*<0.05, vs. MSC9].

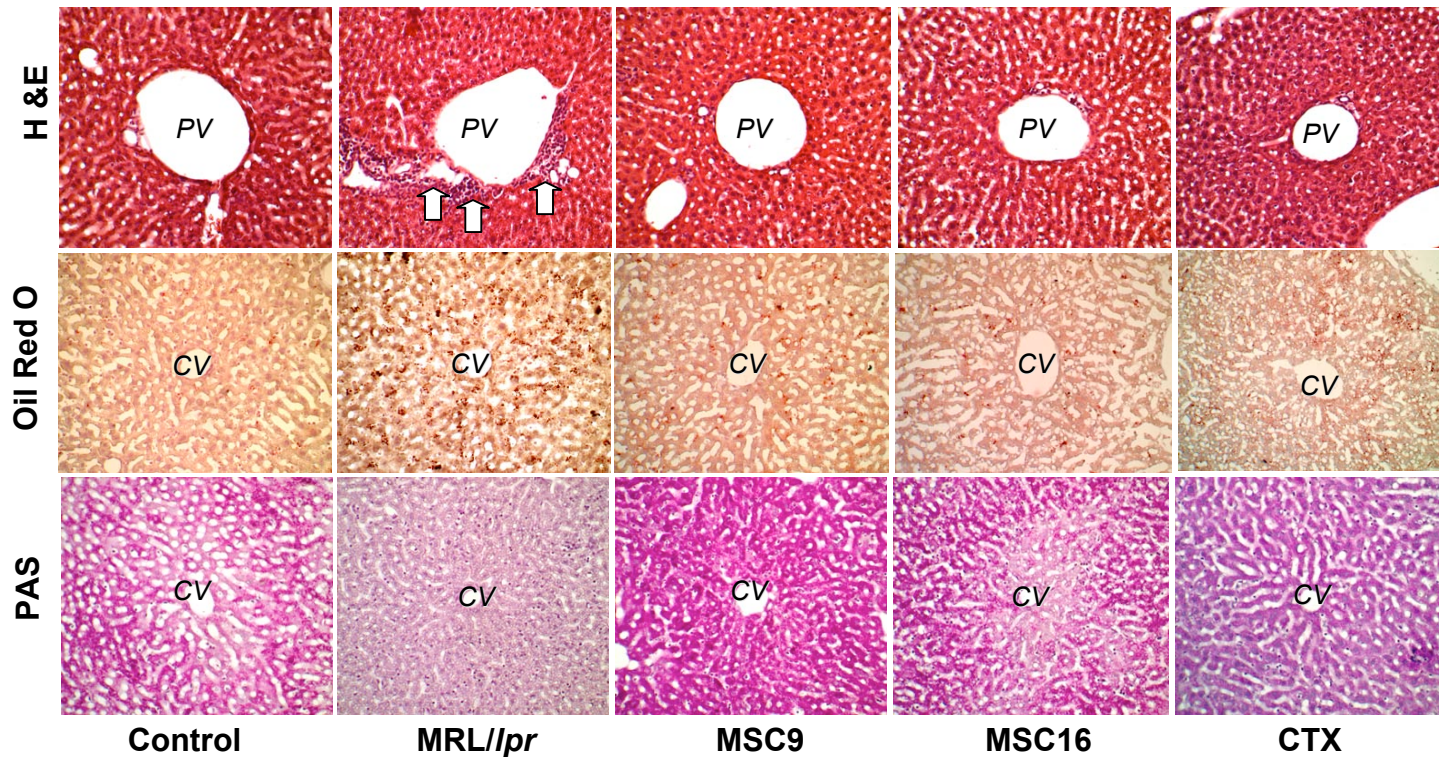

**Supplementary Figure 2. Allogenic MSCT improved liver impairment in MRL/lpr mice.** Inflammatory cells (arrows) presented in the portal triad containing a branches of hepatic portal vein (*PV*), hepatic artery and bile duct in liver of MRL/lpr mice (n=6) (upper panels). After MSCT (MSC9, n=6; MSC16, n=6) and CTX treatment (n=6), the inflammatory cells diminished as shown the similar to control liver (n=6). Histochemical staining revealed that all treatments including MSCT and CTX were capable of recovering elevated numbers of Oil red O positive cells (middle panels) and decreased Periodic acid-Schiff positive glycogen cells (lower panels) in MRL/lpr mice. *CV*: central vein.

A

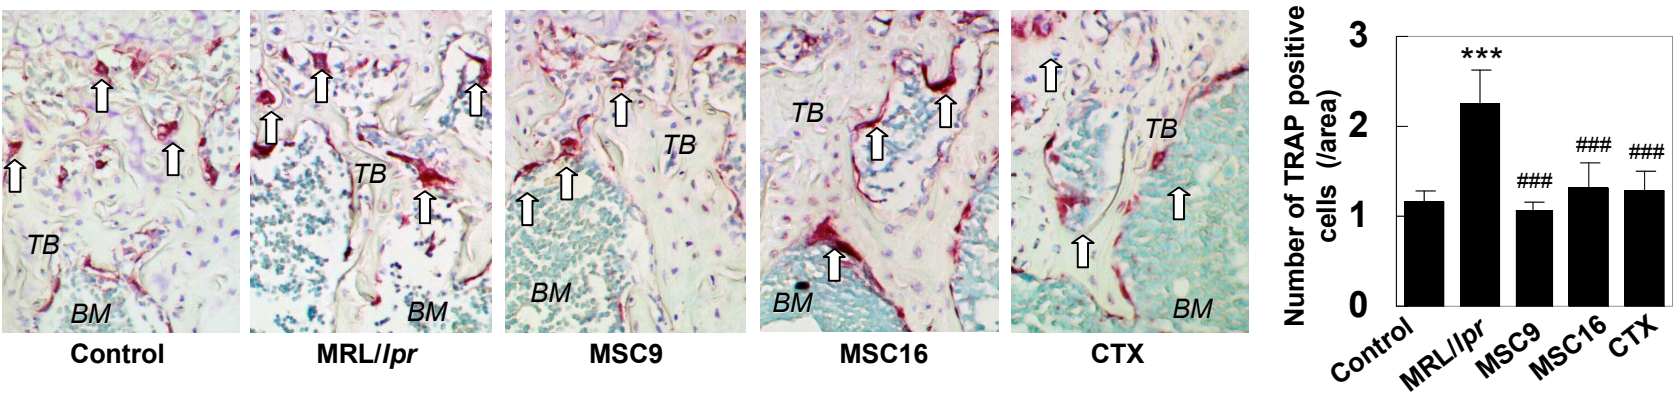

B

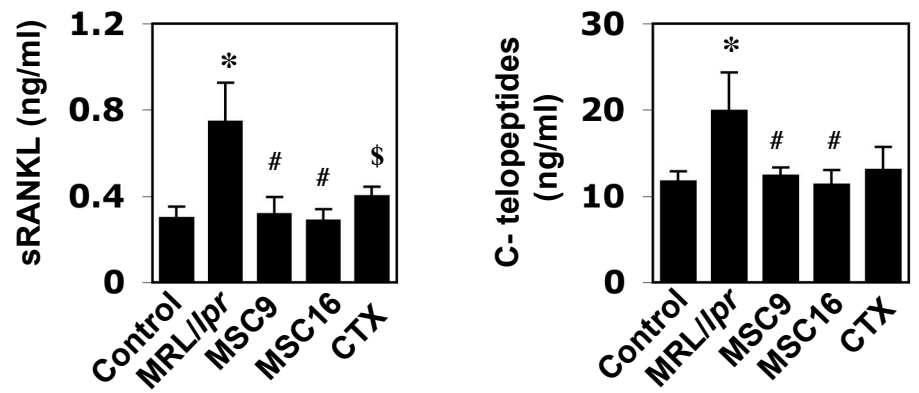

**Supplementary Figure 3. Allogenic MSCT reduced osteoclast activity in MRL/lpr mice** (A) TRAP staining showed that MRL/lpr mice (n=6) had significantly increased numbers of TRAP positive cells (mean±SD, arrows) in epiphysis of the distal femurs as compared to control mice (n=6). MSCT (MSC9, n=6; MSC16, n=6) and CTX treatment (n=6) resulted in significantly decreased number of TRAP positive cells compared to MRL/lpr group. (\*\*\*)*P*<0.001 vs. Control; (###)*P*<0.001 vs. MRL/lpr). (B) ELISA revealed that increased levels (mean±SD) of soluble RANKL (sRANKL) (right panel) and type I collagen C-terminal telopeptides of type I collagen (C-telo peptides) (left panel) in serum of MRL/lpr mice (n=6) were reduced after allogenic MSCT (MSC9, n=6; MSC16, n=6). CTX treatment (n=6) was capable of decrement of both levels, but not efficiently. [\**P*<0.05 vs. Control (n=6); #*P*<0.05 vs. MRL/lpr; \$*P*<0.05 vs. MSC9 and MSC16].



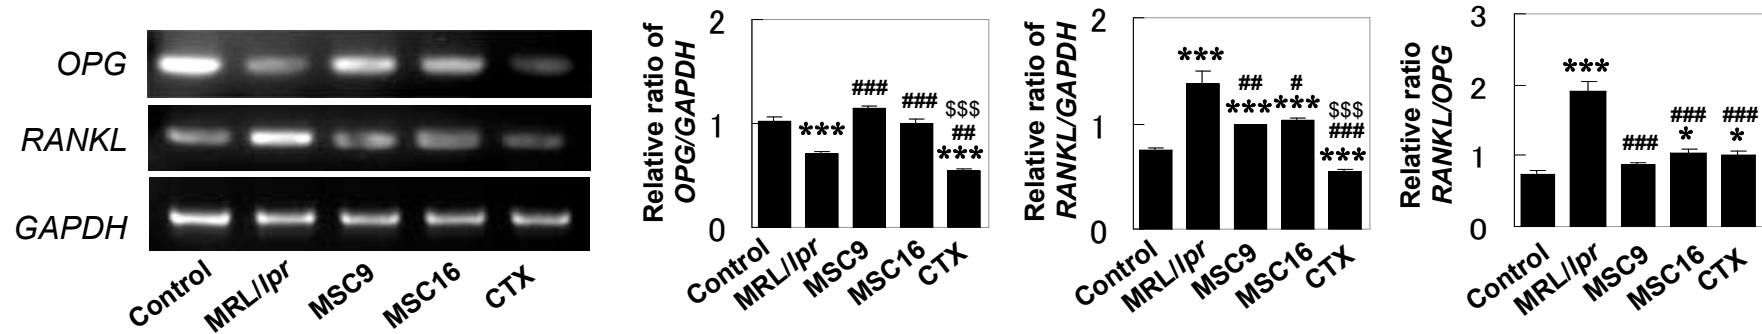

**Supplementary Figure 4. Allogenic MSCT reduced OPG level in splenocytes derived from MRL/lpr mice.** The expression level of Osteoprotegerin (OPG) mRNA in splenocytes of MRL/lpr mice was significantly lower than that in the control as assessed by semi-quantitative RT-PCR. MSCT at 9 weeks (MSC9) and 16 weeks (MSC16) elevated expression level of OPG. However, CTX treatment failed to increase the expression level of OPG. The expression level of RANKL mRNA in splenocytes of MRL/lpr mice was significantly higher than that in control assessed by semi-quantitative RT-PCR. MSCT at 9 weeks (MSC9) and 16 weeks (MSC16) partially reduced the expression level of RANKL. CTX treatment was capable of significantly reducing RANKL level. The relative ratio of RANKL/OPG was significantly higher in MRL/lpr mice compare to the control. MSCT and CTX treatment could reduce the ratio, especially MSC9 group showed the similar level to the control. Three repeated tests per group showed similar results. Values are mean±SD (\*\*\*) $P<0.001$  vs. control; (\*) $P<0.05$  vs. control; (###) $P<0.001$  vs. MRL/lpr; (#) $P<0.05$  vs. MRL/lpr; (\$\$\$) $P<0.001$  vs. MSC9).

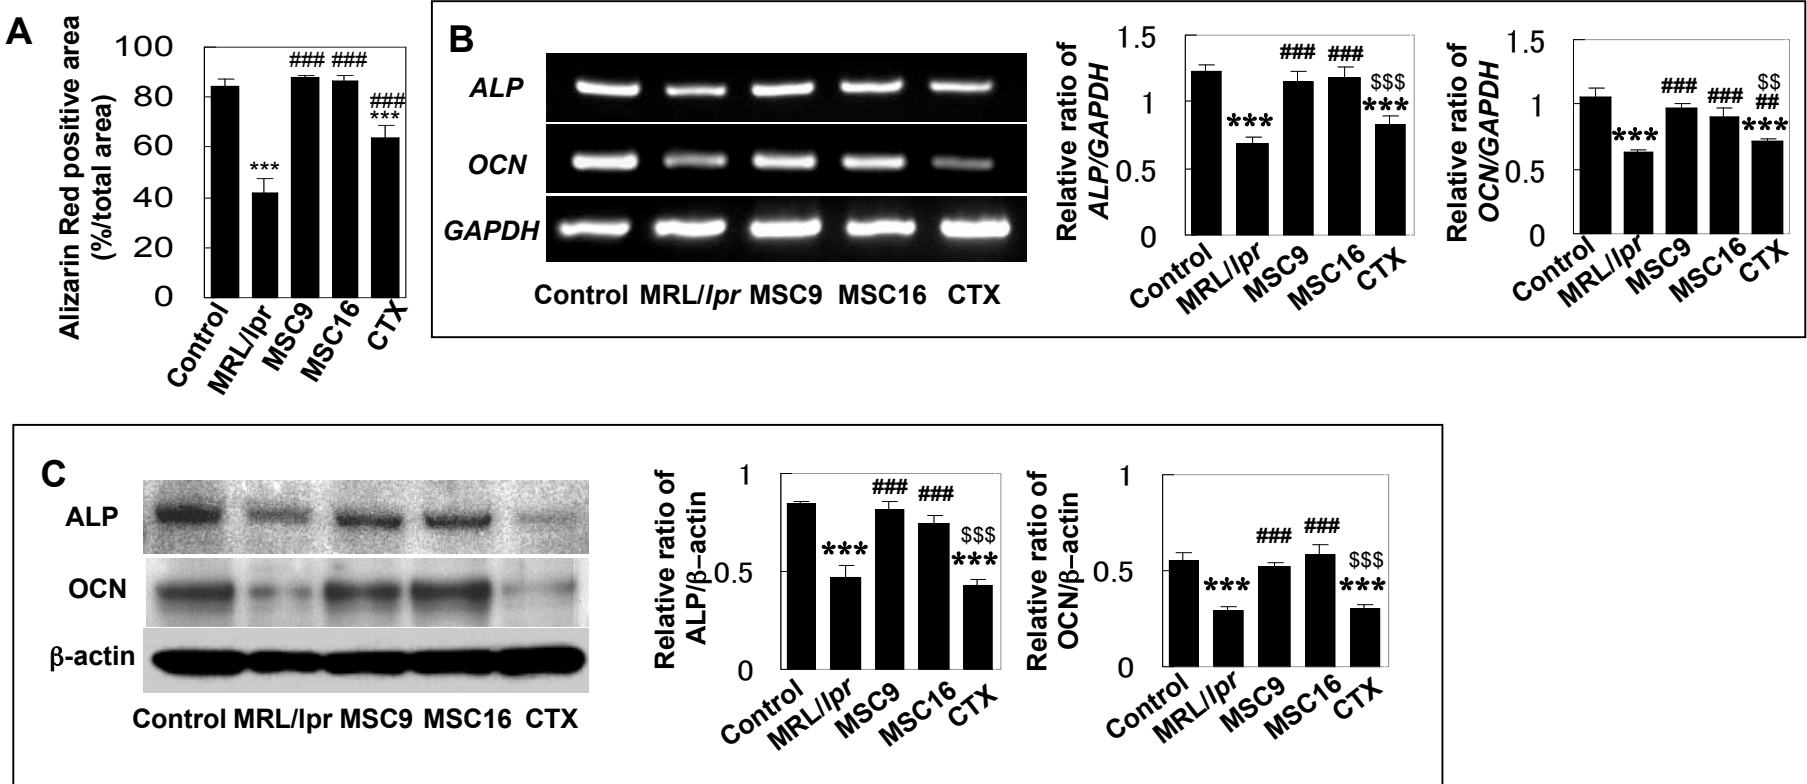

**Supplementary Figure 5. Osteogenic differentiation of BMMSCs derived from MSCT and CTX treated MRL/lpr mice (A)** BMMSCs derived from MRL/lpr mice (n=6) showed significantly decreased calcium accumulation (mean±SD) compared to control mice (n=6) assessed by Alizarin red staining. MSCT (MSC9, n=6; MSC16, n=6) improved calcium accumulation of MRL/lpr-derived BMMSCs compared to the control BMMSCs. Also, CTX treatment (n=6) increased calcium accumulation of MRL/lpr-derived BMMSCs, but the recovered level was significantly less than the control BMMSCs. (\*\*\*)*P*<0.001 vs. Control; (###)*P*<0.001 vs. MRL/lpr). **(B, C)** Semi-quantitative RT-PCR **(B)** and Western blot **(C)** analysis indicated that BMMSCs from MRL/lpr mice expressed lower levels of ALP and OCN than the controls. MSCT, but not CTX, was capable of recovering expression levels of ALP and OCN compared to the MRL/lpr levels. GAPDH and β-actin were used as control for the amount of sample loading in RT-PCR and Western blot, respectively. Six repeated tests per group showed similar results. (\*\*\*)*P*<0.001 vs. Control; (###)*P*<0.001 vs. MRL/lpr; (sss)*P*<0.001 vs. MSCT; (ssp)*P*<0.01 vs. MSCT)

Supplementary Table 1. PCR Primers

| Gene Name             | Sense                        | Anti Sense                      | GenBank Accession Number | Product Size (base pair) |
|-----------------------|------------------------------|---------------------------------|--------------------------|--------------------------|
| mouse Runx2           | 5'-CCGCACGACAACCGCACCAT-3'   | 5'-CGCTCCGGCCACAAATCTC-3'       | NM_009820                | 289                      |
| mouse ALP             | 5'-GCCCTCTCCAAGACATATA-3'    | 5'-CCATGATCACGTCGATATCC-3'      | NM_007431                | 372                      |
| mouse OCN             | 5'-AAGCAGGAGGGCAATAAGGT-3'   | 5'-AGCTGCTGTGACATCCATAC -3'     | NM_007541                | 292                      |
| mouse PPAR $\gamma$ 2 | 5'-GCTGTTATGGGTGAAACTCTG-3'  | 5'-ATAAGGTGGAGATGCAGGTTC-3'     | NM_011146                | 351                      |
| mouse LPL             | 5'-GGGCTCTGCCTGAGTTGTAG-3'   | 5'-AGAAATTTCTGAAGGCCTGGT-3'     | NM_008509                | 198                      |
| mouse Foxp3           | 5'-CCCAGGAAAGACAGCAACCTT-3'  | 5'-CCTTGCCTTTCTCATCCAGGA-3'     | NM_054309                | 159                      |
| mouse IL17            | 5'-CTCCAGAAGGCCCTCAGACTAC-3' | 5'-AGCTTTCCTCCGCATTGACACAG-3'   | NM_010552                | 141                      |
| mouse OPG             | 5'-ATCAGAGCCTCATCACCTT-3'    | 5'-CTTAGGTCCAACACTACAGAGGAAC-3' | NM_008764                | 180                      |
| mouse RANKL           | 5'-ATTTGCACACCTCACCATCAA-3'  | 5'-TAGAGATCTTGGCCCAGCCTC-3'     | NM_011613                | 100                      |
| mouse GAPDH           | 5'-CACCATGGAGAAGGCCGGGGG-3'  | 5'-GACGGACACATTGGGGGTAG-3'      | NM_008084                | 418                      |
| human Runx2           | 5'-CAGTCCCAAGCATTTCATCC-3'   | 5'-TCAATATGGTCGCCAAACAG-3'      | L40992                   | 443                      |
| human OCN             | 5'-CATGAGAGCCCTCACA-3'       | 5'-AGAGCGACACCCTAGAC-3'         | X53698                   | 315                      |
| human GAPDH           | 5'-AGCCGCATCTTCTTTTGCCTC-3'  | 5'-TCATATTTGGCAGGTTTTTCT-3'     | M33197                   | 816                      |
